# Supplementary material for: Assessing the Impact of Influenza Vaccination Timing on Experimental Arthritis: Effects on Disease Progression and Inflammatory Biomarkers
Source: MDPI journal article supplement (doi:10.3390/ijms25063292), 2024-03-14
Supplement: s1 [file s1]

**Table S1. a,** Values of Figure 1 expressed as mean  $\pm$  S.E.M **b,** p-values of Figure 1

**a,**

|      | Baseline control  | CFA control       | CFA early         | CFA late          | Flu early         | Flu late          |
|------|-------------------|-------------------|-------------------|-------------------|-------------------|-------------------|
| N    | 6                 | 7                 | 7                 | 7                 | 7                 | 6                 |
| Unit | Mean $\pm$ S.E.M  |                   |                   |                   |                   |                   |
| %    | 11,12 $\pm$ 4,681 | 5,665 $\pm$ 3,164 | 4,882 $\pm$ 5,438 | 6,476 $\pm$ 3,309 | 10,79 $\pm$ 2,719 | 11,41 $\pm$ 4,794 |
| gram | 313,4 $\pm$ 13,19 | 295,9 $\pm$ 8,866 | 296,1 $\pm$ 15,28 | 299,6 $\pm$ 18,57 | 311,2 $\pm$ 7,641 | 314,4 $\pm$ 9,287 |

**b,**

| Day                                |          | day 2  | day 9  | day 21 |
|------------------------------------|----------|--------|--------|--------|
| Baseline Control vs. Flu early     | p-values | ns     | ns     | ns     |
| Baseline Control vs. Flu late      |          | ns     | ns     | ns     |
| Baseline Control vs. CFA control   |          | ns     | ns     | ns     |
| Baseline Control vs. CFA+Flu early |          | ns     | 0,0156 | 0,0429 |
| Baseline Control vs. CFA+Flu late  |          | ns     | 0,046  | ns     |
| Flu early vs. Flu late             |          | ns     | ns     | ns     |
| Flu early vs. CFA control          |          | ns     | ns     | ns     |
| Flu early vs. CFA+Flu early        |          | ns     | ns     | 0,0048 |
| Flu early vs. CFA+Flu late         |          | ns     | ns     | ns     |
| Flu late vs. CFA control           |          | ns     | ns     | ns     |
| Flu late vs. CFA+Flu early         |          | 0,0474 | 0,0079 | 0,005  |
| Flu late vs. CFA+Flu late          |          | ns     | 0,0104 | ns     |
| CFA control vs. CFA+Flu early      |          | ns     | ns     | ns     |
| CFA control vs. CFA+Flu late       |          | ns     | ns     | ns     |
| CFA+Flu early vs. CFA+Flu late     |          | ns     | ns     | ns     |

**Table S2. a,** Values expressed as mean  $\pm$  S.E.M for Figures 2 A and B **b,** p-values for Figure 2 A **c,** for Figure 2 B

**a,**

|                                |      | Baseline Control     | CFA control        | CFA early          | CFA late           | Flu early           | Flu late             |
|--------------------------------|------|----------------------|--------------------|--------------------|--------------------|---------------------|----------------------|
| N                              |      | 6                    | 6                  | 6                  | 6                  | 6                   | 6                    |
| examination                    | Unit |                      |                    |                    |                    |                     |                      |
| plethysmometry                 | %    | 6,711 $\pm$ 3,301    | 56,53 $\pm$ 11,89  | 60,41 $\pm$ 12,61  | 67,23 $\pm$ 13,87  | 6,371 $\pm$ 4,192   | 8,53 $\pm$ 4,460     |
| dynamic plantar aesthesiometer | %    | - 1,384 $\pm$ 0,9723 | -46,99 $\pm$ 23,95 | -38,33 $\pm$ 20,67 | -40,88 $\pm$ 20,43 | -1,662 $\pm$ 0,8229 | -0,6276 $\pm$ 0,6858 |

**b,**

| Day                                 | 0      | 1      | 4       | 11     | 18     |
|-------------------------------------|--------|--------|---------|--------|--------|
| Baseline Control vs. Flu early      | ns     | ns     | ns      | ns     | ns     |
| Baseline Control vs. Flu late       | ns     | ns     | ns      | ns     | ns     |
| Baseline Control vs. CFA control    | 0,0168 | 0,0378 | 0,0034  | 0,0202 | ns     |
| Baseline Control vs. CFA+ Flu early | 0,0169 | 0,02   | <0,0001 | 0,0065 | ns     |
| Baseline Control vs. CFA+Flu late   | 0,0031 | 0,0004 | 0,0001  | 0,0082 | 0,0389 |
| Flu early vs. Flu late              | ns     | ns     | ns      | ns     | ns     |
| Flu early vs. CFA control           | 0,0182 | 0,0089 | 0,0039  | 0,025  | ns     |
| Flu early vs. CFA+ Flu early        | 0,0182 | 0,0046 | <0,0001 | 0,0081 | ns     |
| Flu early vs. CFA+Flu late          | 0,0028 | 0,0002 | 0,0004  | 0,01   | ns     |
| Flu late vs. CFA control            | 0,0223 | 0,0157 | 0,0025  | 0,0325 | ns     |
| Flu late vs. CFA+ Flu early         | 0,0218 | 0,0081 | <0,0001 | 0,0107 | ns     |
| Flu late vs. CFA+Flu late           | 0,0031 | 0,0002 | 0,0001  | 0,0125 | ns     |
| CFA control vs. CFA+ Flu early      | ns     | ns     | ns      | ns     | ns     |
| CFA control vs. CFA+Flu late        | ns     | ns     | ns      | ns     | ns     |
| CFA+ Flu early vs. CFA+Flu late     | ns     | ns     | ns      | ns     | ns     |

**c,**

| Day                                 | 1       | 4       | 7       | 14      | 21      |
|-------------------------------------|---------|---------|---------|---------|---------|
| Baseline Control vs. Flu early      | ns      | ns      | ns      | ns      | ns      |
| Baseline Control vs. Flu late       | ns      | ns      | ns      | ns      | ns      |
| Baseline Control vs. CFA control    | <0,0001 | 0,0002  | <0,0001 | <0,0001 | <0,0001 |
| Baseline Control vs. CFA+ Flu early | 0,001   | 0,0292  | 0,0002  | 0,0008  | <0,0001 |
| Baseline Control vs. CFA+Flu late   | 0,0003  | <0,0001 | 0,0002  | 0,0104  | 0,0022  |
| Flu early vs. Flu late              | ns      | ns      | ns      | ns      | ns      |
| Flu early vs. CFA control           | 0,0001  | 0,0003  | <0,0001 | <0,0001 | <0,0001 |
| Flu early vs. CFA+ Flu early        | 0,0012  | ns      | <0,0001 | 0,0007  | <0,0001 |
| Flu early vs. CFA+Flu late          | 0,0004  | 0,0003  | 0,0002  | 0,0094  | 0,0029  |
| Flu late vs. CFA control            | <0,0001 | 0,0002  | <0,0001 | <0,0001 | <0,0001 |
| Flu late vs. CFA+ Flu early         | 0,0011  | 0,0282  | <0,0001 | 0,0004  | <0,0001 |
| Flu late vs. CFA+Flu late           | 0,0003  | <0,0001 | 0,0002  | 0,006   | 0,0021  |
| CFA control vs. CFA+ Flu early      | ns      | ns      | ns      | ns      | ns      |
| CFA control vs. CFA+Flu late        | ns      | ns      | ns      | ns      | ns      |
| CFA+ Flu early vs. CFA+Flu late     | ns      | ns      | ns      | ns      | ns      |

**Table S3: a,** Raw data of Figures 3 and 4 **b,** results of Tukey's multiple comparisons test for Figures 3 and 4

**a,**

|       |                  | total photon flux/s Mean $\pm$ S.E.M | photons/s/cm <sup>2</sup> /sr]/[ $\mu$ W/cm <sup>2</sup> Mean $\pm$ S.E.M |
|-------|------------------|--------------------------------------|---------------------------------------------------------------------------|
| Day 2 | Baseline control | 107050 $\pm$ 24065                   | 32616666667 $\pm$ 1943436247                                              |
|       | CFA control      | 414429 $\pm$ 67731                   | 76985714286 $\pm$ 4289268368                                              |

|       |                  |                 |                            |
|-------|------------------|-----------------|----------------------------|
| Day 9 | CFA FLU early    | 508429 ± 64596  | 8223333333 ± 4831953826    |
|       | Flu Early        | 88529 ± 14916   | 28457142857 ± 871467603    |
|       | CFA FLU late     | 468429 ± 61927  | 90000000000 ± 6390804406   |
|       | FLU late         | 121650 ± 24377  | 32700000000 ± 2164563081   |
|       | Baseline control | 68950 ± 7906    | 31166666667 ± 1115546702   |
|       | CFA Control      | 700943 ± 216903 | 114500000000 ± 12332369332 |
|       | CFA FLU early    | 631000 ± 109710 | 102442857143 ± 8037911869  |
|       | FLU early        | 83283 ± 10310   | 32783333333 ± 1210899574   |
|       | CFA FLU late     | 804571 ± 185513 | 106883333333 ± 14120916322 |
|       | FLU late         | 110850 ± 22138  | 33283333333 ± 1613157704   |

b,

|                                       | neutrophil MPO activity |          | plasma leakage |          |
|---------------------------------------|-------------------------|----------|----------------|----------|
|                                       |                         | p-values |                | p-values |
| Control D2 vs. CFA D2                 | ns                      | 0,6059   | ***            | 0,0004   |
| Control D2 vs. CFA FLU early D2       | ns                      | 0,2134   | ****           | <0,0001  |
| Control D2 vs. Flu Early D2           | ns                      | >0,9999  | ns             | >0,9999  |
| Control D2 vs. CFA FLU late D2        | ns                      | 0,3575   | ****           | <0,0001  |
| Control D2 vs. FLU late D2            | ns                      | >0,9999  | ns             | >0,9999  |
| Control D2 vs. Control D9             | ns                      | >0,9999  | ns             | >0,9999  |
| Control D2 vs. CFA D9                 | **                      | 0,0058   | ****           | <0,0001  |
| Control D2 vs. CFA FLU early D9       | *                       | 0,0256   | ****           | <0,0001  |
| Control D2 vs. FLU early D9           | ns                      | >0,9999  | ns             | >0,9999  |
| Control D2 vs. CFA FLU late D9        | ***                     | 0,0005   | ****           | <0,0001  |
| Control D2 vs. FLU late D9            | ns                      | >0,9999  | ns             | >0,9999  |
| CFA D2 vs. CFA FLU early D2           | ns                      | >0,9999  | ns             | >0,9999  |
| CFA D2 vs. Flu Early D2               | ns                      | 0,455    | ****           | <0,0001  |
| CFA D2 vs. CFA FLU late D2            | ns                      | >0,9999  | ns             | 0,9356   |
| CFA D2 vs. FLU late D2                | ns                      | 0,6745   | ***            | 0,0004   |
| CFA D2 vs. Control D9                 | ns                      | 0,4265   | ***            | 0,0002   |
| CFA D2 vs. CFA D9                     | ns                      | 0,6492   | **             | 0,0052   |
| CFA D2 vs. CFA FLU early D9           | ns                      | 0,9171   | ns             | 0,1547   |
| CFA D2 vs. FLU early D9               | ns                      | 0,4926   | ***            | 0,0004   |
| CFA D2 vs. CFA FLU late D9            | ns                      | 0,1996   | ns             | 0,0624   |
| CFA D2 vs. FLU late D9                | ns                      | 0,624    | ***            | 0,0005   |
| CFA FLU early D2 vs. Flu Early D2     | ns                      | 0,1243   | ****           | <0,0001  |
| CFA FLU early D2 vs. CFA FLU late D2  | ns                      | >0,9999  | ns             | 0,9993   |
| CFA FLU early D2 vs. FLU late D2      | ns                      | 0,2607   | ****           | <0,0001  |
| CFA FLU early D2 vs. Control D9       | ns                      | 0,1195   | ****           | <0,0001  |
| CFA FLU early D2 vs. CFA D9           | ns                      | 0,9622   | *              | 0,0439   |
| CFA FLU early D2 vs. CFA FLU early D9 | ns                      | 0,9991   | ns             | 0,5310   |

|                                      |     |         |      |         |
|--------------------------------------|-----|---------|------|---------|
| CFA FLU early D2 vs. FLU early D9    | ns  | 0,1501  | ***  | 0,0001  |
| CFA FLU early D2 vs. CFA FLU late D9 | ns  | 0,6018  | ns   | 0,2865  |
| CFA FLU early D2 vs. FLU late D9     | ns  | 0,2251  | ***  | 0,0001  |
| Flu Early D2 vs. CFA FLU late D2     | ns  | 0,232   | **** | <0,0001 |
| Flu Early D2 vs. FLU late D2         | ns  | >0,9999 | ns   | >0,9999 |
| Flu Early D2 vs. Control D9          | ns  | >0,9999 | ns   | >0,9999 |
| Flu Early D2 vs. CFA D9              | **  | 0,0021  | **** | <0,0001 |
| Flu Early D2 vs. CFA FLU early D9    | *   | 0,011   | **** | <0,0001 |
| Flu Early D2 vs. FLU early D9        | ns  | >0,9999 | ns   | >0,9999 |
| Flu Early D2 vs. CFA FLU late D9     | *** | 0,0001  | **** | <0,0001 |
| Flu Early D2 vs. FLU late D9         | ns  | >0,9999 | ns   | >0,9999 |
| CFA FLU late D2 vs. FLU late D2      | ns  | 0,4206  | **** | <0,0001 |
| CFA FLU late D2 vs. Control D9       | ns  | 0,2192  | **** | <0,0001 |
| CFA FLU late D2 vs. CFA D9           | ns  | 0,8731  | ns   | 0,2450  |
| CFA FLU late D2 vs. CFA FLU early D9 | ns  | 0,9895  | ns   | 0,9523  |
| CFA FLU late D2 vs. FLU early D9     | ns  | 0,2663  | **** | <0,0001 |
| CFA FLU late D2 vs. CFA FLU late D9  | ns  | 0,4069  | ns   | 0,7738  |
| CFA FLU late D2 vs. FLU late D9      | ns  | 0,3735  | **** | <0,0001 |
| FLU late D2 vs. Control D9           | ns  | >0,9999 | ns   | >0,9999 |
| FLU late D2 vs. CFA D9               | **  | 0,008   | **** | <0,0001 |
| FLU late D2 vs. CFA FLU early D9     | *   | 0,0341  | **** | <0,0001 |
| FLU late D2 vs. FLU early D9         | ns  | >0,9999 | ns   | >0,9999 |
| FLU late D2 vs. CFA FLU late D9      | *** | 0,0007  | **** | <0,0001 |
| FLU late D2 vs. FLU late D9          | ns  | >0,9999 | ns   | >0,9999 |
| Control D9 vs. CFA D9                | **  | 0,0024  | **** | <0,0001 |
| Control D9 vs. CFA FLU early D9      | *   | 0,0116  | **** | <0,0001 |
| Control D9 vs. FLU early D9          | ns  | >0,9999 | ns   | >0,9999 |
| Control D9 vs. CFA FLU late D9       | *** | 0,0002  | **** | <0,0001 |
| Control D9 vs. FLU late D9           | ns  | >0,9999 | ns   | >0,9999 |
| CFA D9 vs. CFA FLU early D9          | ns  | >0,9999 | ns   | 0,9712  |
| CFA D9 vs. FLU early D9              | **  | 0,0033  | **** | <0,0001 |
| CFA D9 vs. CFA FLU late D9           | ns  | 0,9998  | ns   | 0,9996  |
| CFA D9 vs. FLU late D9               | **  | 0,0063  | **** | <0,0001 |
| CFA FLU early D9 vs. FLU early D9    | *   | 0,0157  | **** | <0,0001 |
| CFA FLU early D9 vs. CFA FLU late D9 | ns  | 0,9824  | ns   | >0,9999 |
| CFA FLU early D9 vs. FLU late D9     | *   | 0,0276  | **** | <0,0001 |
| FLU early D9 vs. CFA FLU late D9     | *** | 0,0003  | **** | <0,0001 |
| FLU early D9 vs. FLU late D9         | ns  | >0,9999 | ns   | >0,9999 |
| CFA FLU late D9 vs. FLU late D9      | *** | 0,0005  | **** | <0,0001 |

**Table S4:** Raw expression data of western blot analysis (Figure 5) expressed as mean  $\pm$  S.E.M

|                  | N | Examined protein | MPO               | MMP9              | HMOX1             | TNF-alpha         |
|------------------|---|------------------|-------------------|-------------------|-------------------|-------------------|
| Baseline Control | 5 | Mean $\pm$ SD    | 0 $\pm$ 0         | 0 $\pm$ 0         | 97,28 $\pm$ 43,21 | 100 $\pm$ 0       |
| CFA control      | 5 |                  | 18,14 $\pm$ 3,344 | 85,56 $\pm$ 21,87 | 78,56 $\pm$ 24,44 | 128,4 $\pm$ 63,54 |
| CFA early        | 5 |                  | 141,3 $\pm$ 63,15 | 91,93 $\pm$ 9,933 | 98,17 $\pm$ 19,44 | 55,87 $\pm$ 15,35 |
| CFA late         | 5 |                  | 215,9 $\pm$ 33,05 | 133,2 $\pm$ 10,78 | 155,1 $\pm$ 29,44 | 243,9 $\pm$ 107,2 |
| Flu early        | 5 |                  | 0 $\pm$ 0         | 4,078 $\pm$ 4,078 | 41,12 $\pm$ 32,81 | 89,10 $\pm$ 34,11 |
| Flu late         | 5 |                  | 0 $\pm$ 0         | 0 $\pm$ 0         | 6,311 $\pm$ 3,318 | 54,12 $\pm$ 21,16 |
|                  |   |                  |                   |                   |                   | N=3               |

**Table S5:** p-values of parameters in Figure 5

|                                  | N | Examined protein | MPO    | MMP9   | HMOX1 | TNF-alpha<br>N=3 |
|----------------------------------|---|------------------|--------|--------|-------|------------------|
| Baseline control vs. CFA control | 5 | p-values         | ns     | ns     | ns    | ns               |
| Baseline control vs. CFA early   | 5 |                  | 0,0236 | ns     | ns    | ns               |
| Baseline control vs. CFA late    | 5 |                  | 0,0003 | 0,0038 | ns    | ns               |
| Baseline control vs. Flu early   | 5 |                  | ns     | ns     | ns    | ns               |
| Baseline control vs. Flu late    | 5 |                  | ns     | ns     | ns    | ns               |
| CFA control vs. CFA early        | 5 |                  | ns     | ns     | ns    | ns               |
| CFA control vs. CFA late         | 5 |                  | 0,0009 | ns     | ns    | ns               |
| CFA control vs. Flu early        | 5 |                  | ns     | ns     | ns    | ns               |
| CFA control vs. Flu late         | 5 |                  | ns     | ns     | ns    | ns               |
| CFA early vs. CFA late           | 5 |                  | ns     | ns     | ns    | ns               |
| CFA early vs. Flu early          | 5 |                  | 0,0236 | ns     | ns    | ns               |
| CFA early vs. Flu late           | 5 |                  | 0,0236 | ns     | ns    | ns               |
| CFA late vs. Flu early           | 5 |                  | 0,0003 | 0,0012 | ns    | ns               |
| CFA late vs. Flu late            | 5 |                  | 0,0003 | 0,0038 | 0,012 | ns               |
| Flu early vs. Flu late           | 5 |                  | ns     | ns     | ns    | ns               |

**Table S6.** Data for Figure 1S and 2S

|                                   | nMPO activity               |              | vascular leakage                                                 |              |
|-----------------------------------|-----------------------------|--------------|------------------------------------------------------------------|--------------|
|                                   | total photon<br>flux/s Mean | $\pm$ S.E.M. | photons/s/cm <sup>2</sup> /sr)/[<br>$\mu$ W/cm <sup>2</sup> Mean | $\pm$ S.E.M. |
| Sham control D2<br>contralateral  | 95867                       | 22855        | 31883333333                                                      | 1797297354   |
| Sham control D2 treated           | 107050                      | 24065        | 32616666667                                                      | 1943436247   |
| CFA control D2<br>contralateral   | 74857                       | 3955         | **** 33928571429                                                 | 1651509308   |
| CFA control D2 treated            | 414429                      | 67731        | 76985714286                                                      | 4289268368   |
| CFA Flu early D2<br>contralateral | 84829                       | 9748         | **** 31550000000                                                 | 876641318    |

|                                     |             |        |                  |             |
|-------------------------------------|-------------|--------|------------------|-------------|
| CFA Flu early D2 treated            | 508429      | 64596  | 8223333333       | 4831953826  |
| Sham Flu early D2 contralateral     | 82857       | 9523   | 2828333333       | 574697988   |
| Sham Flu early D2 treated           | 88529       | 14916  | 28457142857      | 871467603   |
| Sham control early D2 contralateral | 98617       | 23244  | 3256666667       | 862811940   |
| Sham control D9 treated             | 68950       | 7906   | 3116666667       | 1115546702  |
| CFA control D9 contralateral        | **** 117929 | 14503  | **** 39300000000 | 2677312085  |
| CFA control D9 treated              | 700943      | 216903 | 1,145E+11        | 12332369332 |
| CFA Flu early D9 contralateral      | 106714      | 11823  | **** 40242857143 | 2252919497  |
| CFA Flu early D9 treated            | 83283       | 10310  | 1,02443E+11      | 8037911869  |
| Sham Flu early D9contralateral      | **** 90050  | 9803   | 3261666667       | 781629352   |
| Sham Flu early D9 treated           | 631000      | 109710 | 3278333333       | 1210899574  |
| CFA Flu late D2 contralateral       | 135429      | 11082  | **** 38971428571 | 2521877068  |
| CFA Flu late D2 treated             | 468429      | 61927  | 90000000000      | 6390804406  |
| Sham Flu late D2 contralateral      | 95600       | 19186  | 3471666667       | 2596589644  |
| Sham Flu late D2 treated            | 121650      | 24377  | 32700000000      | 2164563081  |
| CFA Flu late D9 contralateral       | **** 110843 | 13685  | **** 3256666667  | 862811940   |
| CFA Flu late D9 treated             | 804571      | 185513 | 1,06883E+11      | 14120916322 |
| Sham Flu late D9 contralateral      | 78967       | 12270  | 32350000000      | 1380519226  |
| Sham Flu late D9 treated            | 110850      | 22138  | 3328333333       | 1613157704  |
| **** : contra vs. ipsi<br>p<0,0001  |             |        |                  |             |

**Figure S1.** Comparison of the effect of Freund's complete adjuvant and **a**, early influenza vaccination or **b**, late influenza vaccination on myeloperoxidase activity in the treated and the contralateral paws of the animals.

**a,**

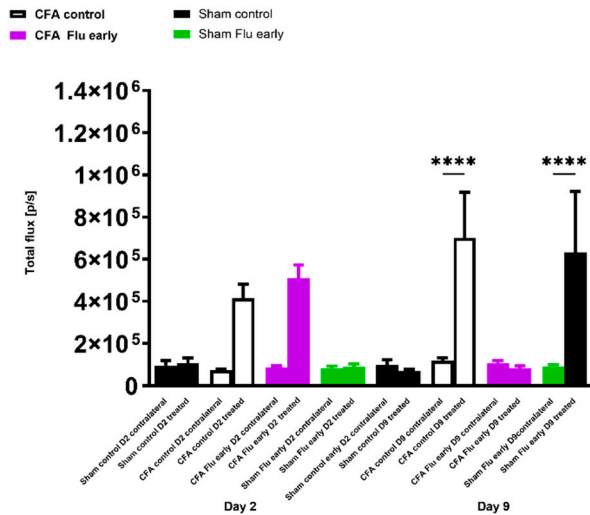

**b,**

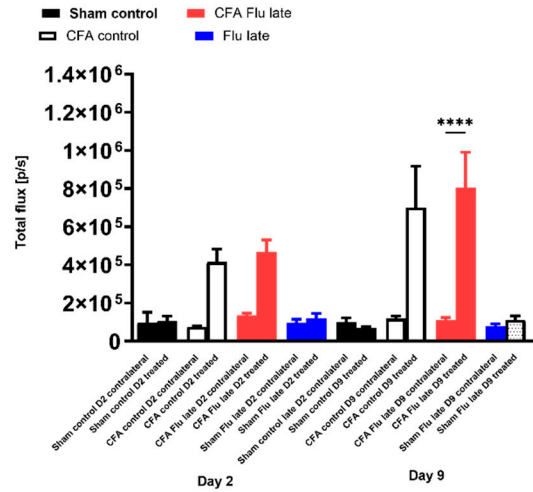

**Figure S2.** Comparison of the effect of Freund's complete adjuvant and **a**, early influenza vaccination or **b**, late influenza vaccination on vascular leakage in the treated and the contralateral paws of the animals.

**a,**

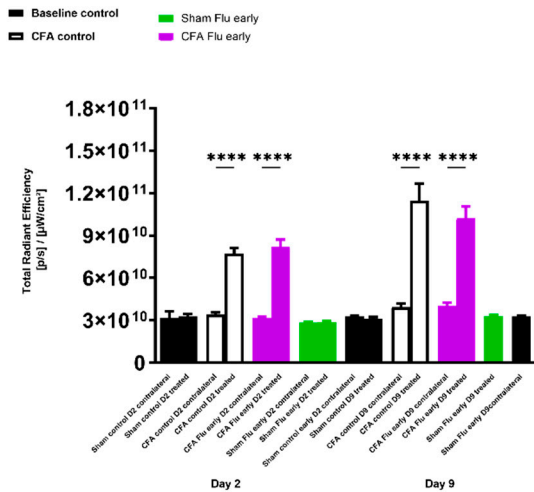

**b,**

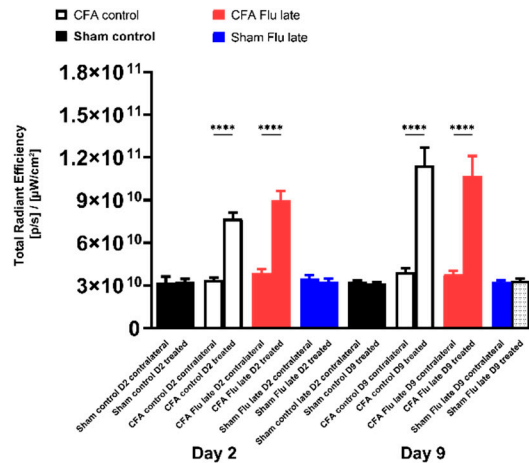

**Figure S3.** Microscopic Morphometry of Joint Inflammation

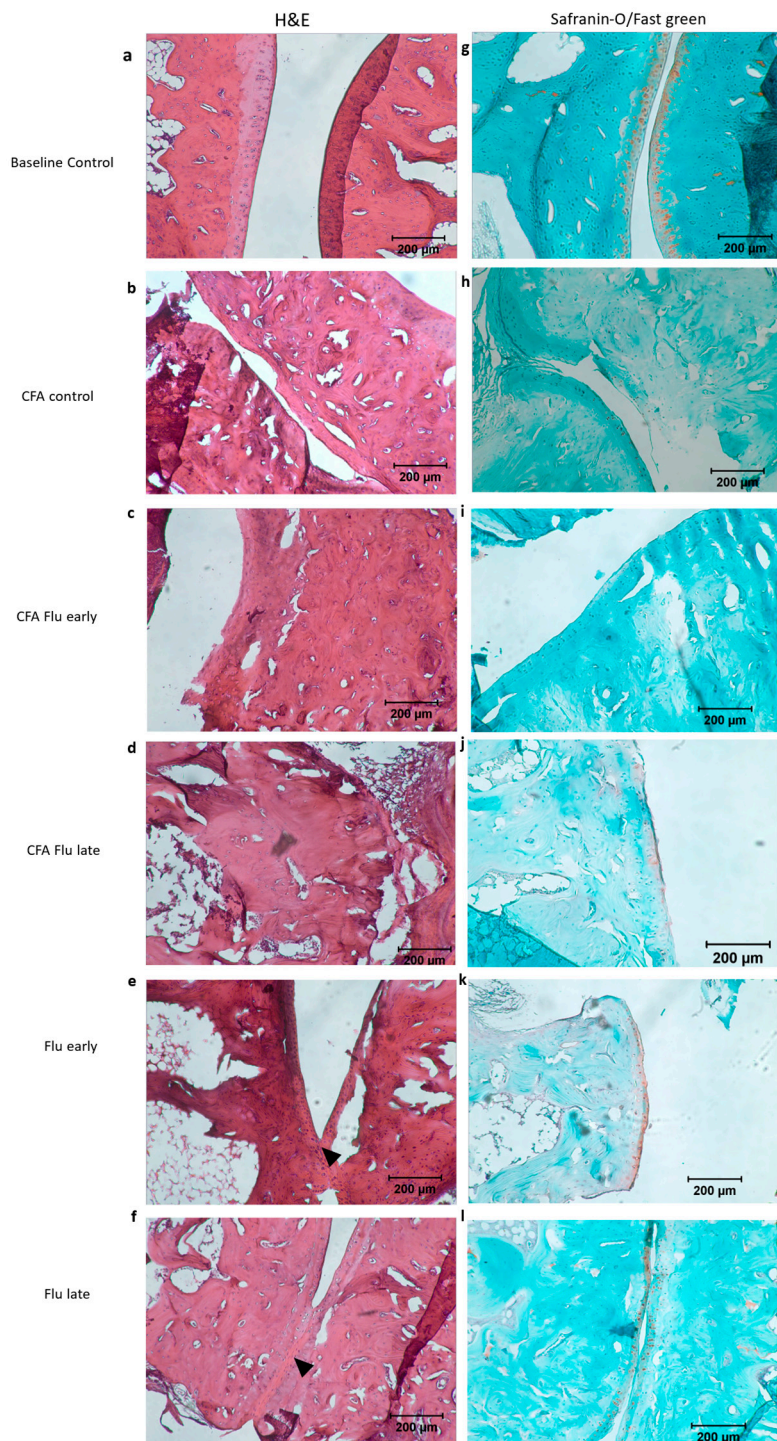

Histologic samples of the experimental animals. **a, g** Baseline control **b, h** CFA control **c, i** CFA Flu early **d, j** CFA Flu late **e, k** Flu early **f, l** Flu late from rats injected with the FluArt vaccine on the seventh day of the experiment. Samples a-f stained with H&E, g-l stained with Safranin-O/Fast Green. (magnification: 400x) Dark triangles mark the accreted cartilaginous tissue of the joint.

*When analyzing the histological samples the signs of inflammation were detectable on the specimens taken from CFA-treated animals (Figure 7. d,e,f,j,k,l)). Mononuclear cell infiltration, bone destruction, and invading synovium were also observable in the groups where the animals were also administered influenza vaccine (Figure 7. e,k,f,l). By the samples of animals from the group Flu early and Flu late a special aberration was detected, the surface of the joint accreted (Figure 7. b,c)*
